# Supplementary material for: Rapid, label-free CD4 testing using a smartphone compatible device
Source: Royal Society of Chemistry journal article supplement (doi:10.1039/c7lc00273d), 2017-01-01
Supplement: c7lc00273d1.pdf [file c7lc00273d1.pdf]

## Rapid, label-free CD4 testing using a smartphone compatible device

Manoj Kumar Kanakasabapathy<sup>1</sup>, Hardik J. Pandya<sup>1</sup>†, Mohamed Shehata Draz<sup>1</sup>, Manjyot Kaur Chug<sup>1</sup>, Magesh Sadasivam<sup>1</sup>, Shreya Kumar<sup>1</sup>, Behzad Etemad<sup>2</sup>, Vinish Yogesh, Mohammadali Safavieh<sup>1</sup>, Waseem Asghar<sup>4</sup>, Jonathan Z. Li<sup>2,3</sup>, Athe M. Tsibris<sup>2</sup>, Daniel R. Kuritzkes<sup>2,3</sup>, Hadi Shafiee<sup>1,3\*</sup>

### Affiliations:

<sup>1</sup> Division of Engineering in Medicine, Department of Medicine, Brigham and Women's Hospital, Harvard Medical School, Boston, MA, 02139, USA

<sup>2</sup> Division of Infectious Diseases, Brigham and Women's Hospital, Harvard Medical School, Boston, MA, 02114, USA

<sup>3</sup> Department of Medicine, Harvard Medical School, Boston, MA, 02115, USA

<sup>4</sup> Department of Computer and Electrical Engineering and Computer Science, Florida Atlantic University, Boca Raton, FL, 33431, USA

† Current address: Department of Electronic Systems Engineering, Division of Electrical Sciences, Indian Institute of Science, Bangalore 560 012, INDIA

\* Corresponding author. E-mail: hshafiee@bwh.harvard.edu

## Supplementary Materials

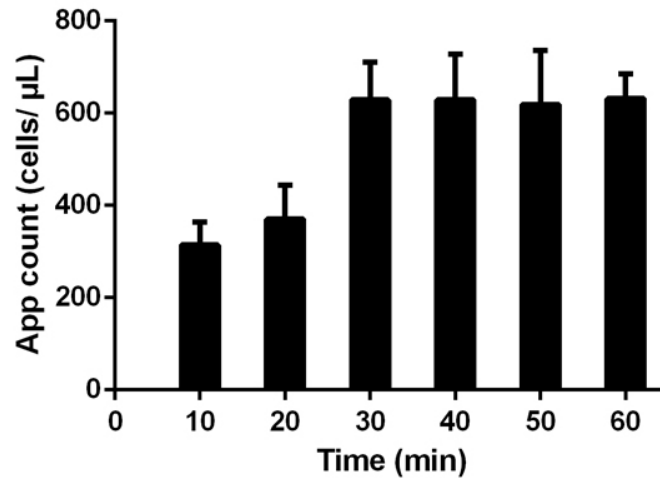

**Figure S1. Optimization of on-chip cell capture incubation time.** Whole blood samples were incubated on functionalized microchips between 10 and 60 minutes and the number of captured cells were counted at the end of the incubation times.

## Cell capture efficiency and specificity evaluations

Captured cells were fixed with 4% (v/v) paraformaldehyde solution in PBS for 10 minutes. After fixation, cells were incubated with 0.2% (v/v) Triton X-100 for 5 minutes. Channels were washed with ice-cold PBS after every step. FITC anti-human CD4 antibody (357406, BioLegend) was added to the chip and incubated for 1 hour in a dark room at room temperature. After the incubation, the channel was washed and captured cells were stained with 0.2% (v/v) DAPI solution for 15 minutes in a dark room at room temperature. DAPI was obtained from Sigma-Aldrich (stock concentration: 5mg DAPI in 1 mL of deionized water). DAPI is a cell permeable fluorescent minor groove-binding probe for DNA which binds to the minor groove of double-stranded DNA, forming a stable complex.

A fluorescent microscope (Observer D1, Zeiss) was used for bright field and fluorescent imaging. Cells stained with blue represented DAPI, whereas cells in green represented CD4+ T

cells tagged with FITC. The ratio between the CD4+ T cells stained in green to other cells (green/blue) was measured to calculate the specificity.

Similarly, in evaluating cell capture efficiency, spiked PBS samples with known CD4 concentrations were loaded into microchips and were incubated for 30 minutes. We measured the number of cells on-chip before and after washing step. The cell capture efficiency was estimated to be 84%.

Cell capture efficiency was calculated by using the following formula:

$$\text{Cell capture efficiency (\%)} = \left( \frac{\text{CD4 cells cells after wash}}{\text{CD4 cells before wash}} \right) * 100$$

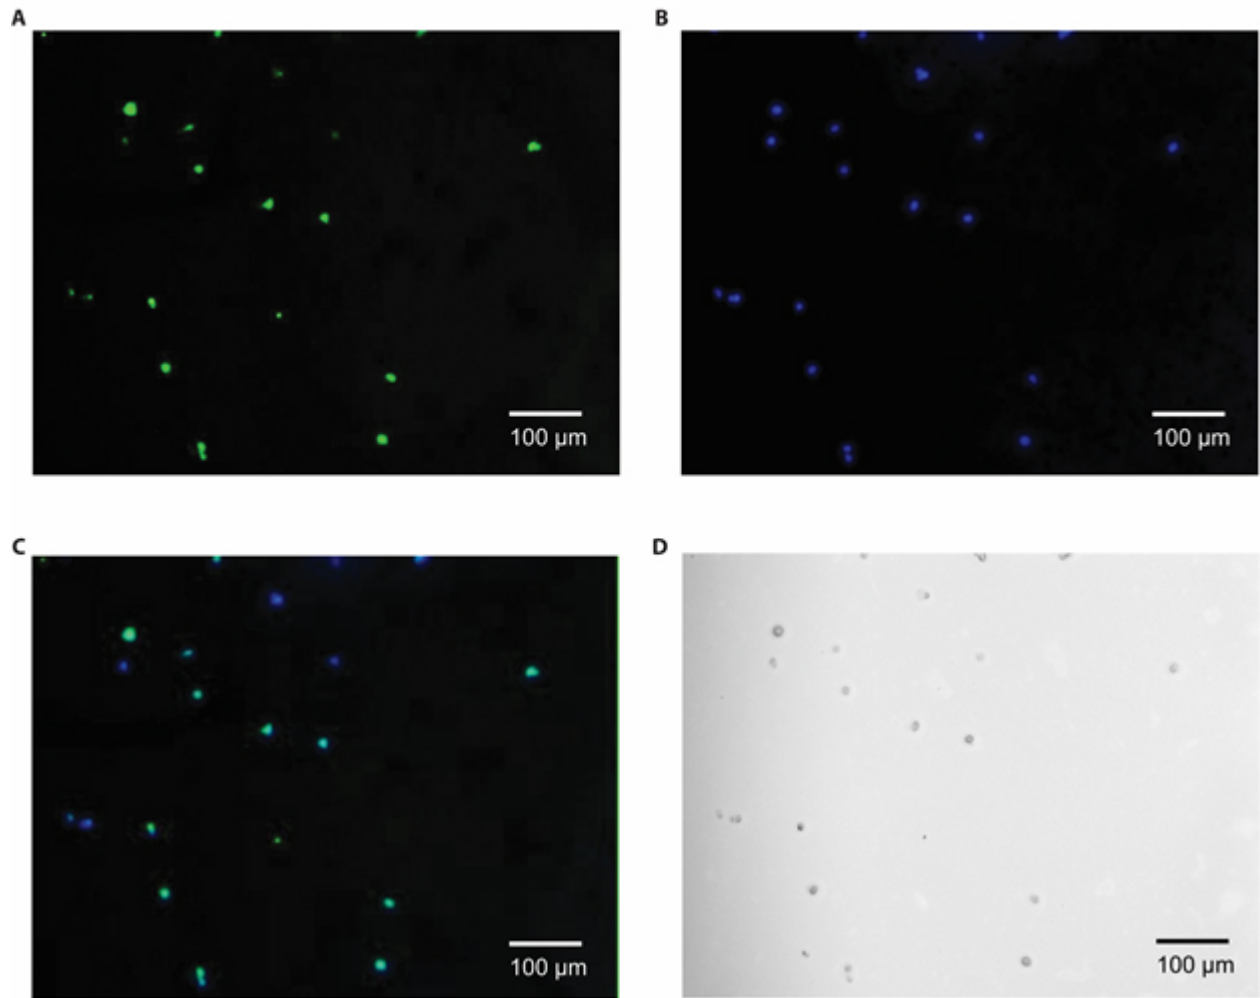

**Figure S2. Specificity analysis using fluorescent images to identify the captured cells.** (A) Fluorescent image of captured CD4 cells using whole blood and stained with FITC. The cells were also stained with (B) DAPI. (C) Image showing the overlay of the cells expressing both FITC and DAPI. (D) Bright field image of the cells captured from fresh whole blood. The images were all captured with a 10x objective.

*Raw data – Isolated CD4 samples*

| <b>Sample #</b>  | <b>Hemocytometer (cells/<math>\mu</math>L)</b> | <b>Smartphone application output (cells/<math>\mu</math>L)</b> |             |             |         |
|------------------|------------------------------------------------|----------------------------------------------------------------|-------------|-------------|---------|
|                  |                                                | Replicate 1                                                    | Replicate 2 | Replicate 3 | Average |
| <b>Sample 1</b>  | 60                                             | 130                                                            | 98          | 65          | 97.67   |
| <b>Sample 2</b>  | 100                                            | 98                                                             | 130         | 130         | 119.33  |
| <b>Sample 3</b>  | 160                                            | 228                                                            | 130         | 200         | 186.00  |
| <b>Sample 4</b>  | 160                                            | 163                                                            | 228         | 260         | 217.00  |
| <b>Sample 5</b>  | 180                                            | 33                                                             | 195         | 130         | 119.33  |
| <b>Sample 6</b>  | 260                                            | 228                                                            | 195         | 260         | 227.67  |
| <b>Sample 7</b>  | 320                                            | 260                                                            | 195         | 293         | 249.33  |
| <b>Sample 8</b>  | 350                                            | 228                                                            | 293         | 391         | 304.00  |
| <b>Sample 9</b>  | 520                                            | 326                                                            | 423         | 488         | 412.33  |
| <b>Sample 10</b> | 820                                            | 521                                                            | 521         | 553         | 531.67  |
| <b>Sample 11</b> | 960                                            | 568                                                            | 586         | 488         | 547.33  |
| <b>Sample 12</b> | 1000                                           | 879                                                            | 749         | 911         | 846.33  |
| <b>Sample 13</b> | 1100                                           | 716                                                            | 781         | 814         | 770.33  |
| <b>Sample 14</b> | 400                                            | 684                                                            | 749         | 749         | 727.33  |
| <b>Sample 15</b> | 1640                                           | 1725                                                           | 1888        | 1640        | 1751.00 |
| <b>Sample 16</b> | 680                                            | 553                                                            | 163         | 326         | 347.33  |
| <b>Sample 17</b> | 800                                            | 423                                                            | 1360        | 423         | 735.33  |
| <b>Sample 18</b> | 1040                                           | 977                                                            | 553         | 619         | 716.33  |
| <b>Sample 19</b> | 680                                            | 423                                                            | 358         | 488         | 423.00  |
| <b>Sample 20</b> | 220                                            | 130                                                            | 163         | 163         | 152.00  |
| <b>Sample 21</b> | 260                                            | 130                                                            | 130         | 98          | 119.33  |
| <b>Sample 22</b> | 240                                            | 293                                                            | 98          | 98          | 163.00  |
| <b>Sample 23</b> | 160                                            | 163                                                            | 130         | 98          | 130.33  |
| <b>Sample 24</b> | 60                                             | 98                                                             | 65          | 33          | 65.33   |
| <b>Sample 25</b> | 30                                             | 0                                                              | 0           | 0           | 0.00    |

|                  |      |      |      |      |         |
|------------------|------|------|------|------|---------|
| <b>Sample 26</b> | 20   | 0    | 0    | 0    | 0.00    |
| <b>Sample 27</b> | 0    | 0    | 0    | 0    | 0.00    |
| <b>Sample 28</b> | 420  | 390  | 391  | 326  | 369.00  |
| <b>Sample 29</b> | 460  | 423  | 326  | 326  | 358.33  |
| <b>Sample 30</b> | 300  | 298  | 228  | 293  | 273.00  |
| <b>Sample 31</b> | 180  | 228  | 163  | 228  | 206.33  |
| <b>Sample 32</b> | 160  | 163  | 130  | 228  | 173.67  |
| <b>Sample 33</b> | 800  | 621  | 684  | 651  | 652.00  |
| <b>Sample 34</b> | 660  | 781  | 684  | 521  | 662.00  |
| <b>Sample 35</b> | 740  | 619  | 684  | 716  | 673.00  |
| <b>Sample 36</b> | 760  | 781  | 721  | 716  | 739.33  |
| <b>Sample 37</b> | 580  | 521  | 521  | 586  | 542.67  |
| <b>Sample 38</b> | 980  | 1270 | 1042 | 1042 | 1118.00 |
| <b>Sample 39</b> | 820  | 1237 | 1270 | 1042 | 1183.00 |
| <b>Sample 40</b> | 800  | 1302 | 1074 | 944  | 1106.67 |
| <b>Sample 41</b> | 720  | 977  | 1074 | 846  | 965.67  |
| <b>Sample 42</b> | 600  | 553  | 521  | 553  | 542.33  |
| <b>Sample 43</b> | 1060 | 1074 | 916  | 1400 | 1130.00 |
| <b>Sample 44</b> | 1040 | 977  | 814  | 977  | 922.67  |
| <b>Sample 45</b> | 780  | 553  | 521  | 521  | 531.67  |
| <b>Sample 46</b> | 1000 | 911  | 1107 | 1270 | 1096.00 |
| <b>Sample 47</b> | 960  | 977  | 911  | 911  | 933.00  |
| <b>Sample 48</b> | 420  | 391  | 326  | 358  | 358.33  |
| <b>Sample 49</b> | 980  | 781  | 814  | 751  | 782.00  |
| <b>Sample 50</b> | 900  | 619  | 1270 | 621  | 836.67  |
| <b>Sample 51</b> | 800  | 684  | 749  | 1139 | 857.33  |
| <b>Sample 52</b> | 890  | 879  | 846  | 1107 | 944.00  |
| <b>Sample 53</b> | 1060 | 846  | 716  | 814  | 792.00  |

|                  |      |      |      |      |         |
|------------------|------|------|------|------|---------|
| <b>Sample 54</b> | 900  | 749  | 911  | 814  | 824.67  |
| <b>Sample 55</b> | 1200 | 1432 | 1335 | 1042 | 1269.67 |
| <b>Sample 56</b> | 120  | 98   | 130  | 163  | 130.33  |
| <b>Sample 57</b> | 60   | 65   | 65   | 163  | 97.67   |

Table S1. Raw sample data for all isolated CD4 samples tested without using functionalized microfluidic chips.

*Raw data – Isolated CD4 samples*

| <i>Sample #</i>  | <i>Hemocytometer (cells/<math>\mu</math>L)</i> | <i>Smartphone application (cells/<math>\mu</math>L)</i> |             |             |         |
|------------------|------------------------------------------------|---------------------------------------------------------|-------------|-------------|---------|
|                  |                                                | Replicate 1                                             | Replicate 2 | Replicate 3 | Average |
| <b>Sample 1</b>  | 820                                            | 521                                                     | 553         | 942         | 672.00  |
| <b>Sample 2</b>  | 600                                            | 651                                                     | 684         | 521         | 618.67  |
| <b>Sample 3</b>  | 1000                                           | 1335                                                    | 1204        | 1107        | 1215.33 |
| <b>Sample 4</b>  | 960                                            | 456                                                     | 488         | 423         | 455.67  |
| <b>Sample 5</b>  | 980                                            | 553                                                     | 619         | 586         | 586.00  |
| <b>Sample 6</b>  | 1200                                           | 781                                                     | 1042        | 1042        | 955.00  |
| <b>Sample 7</b>  | 600                                            | 586                                                     | 651         | 684         | 640.33  |
| <b>Sample 8</b>  | 300                                            | 260                                                     | 315         | 326         | 300.33  |
| <b>Sample 9</b>  | 360                                            | 258                                                     | 423         | 456         | 379.00  |
| <b>Sample 10</b> | 440                                            | 358                                                     | 358         | 456         | 390.67  |
| <b>Sample 11</b> | 700                                            | 651                                                     | 586         | 586         | 607.67  |
| <b>Sample 12</b> | 780                                            | 619                                                     | 716         | 684         | 673.00  |
| <b>Sample 13</b> | 860                                            | 1009                                                    | 840         | 1002        | 950.33  |
| <b>Sample 14</b> | 700                                            | 521                                                     | 749         | 684         | 651.33  |
| <b>Sample 15</b> | 800                                            | 619                                                     | 619         | 651         | 629.67  |
| <b>Sample 16</b> | 1200                                           | 1204                                                    | 781         | 1042        | 1009.00 |
| <b>Sample 17</b> | 280                                            | 195                                                     | 195         | 195         | 195.00  |

|                  |        |     |     |     |        |
|------------------|--------|-----|-----|-----|--------|
| <b>Sample 18</b> | 440    | 423 | 326 | 423 | 390.67 |
| <b>Sample 19</b> | 220    | 195 | 163 | 163 | 173.67 |
| <b>Sample 20</b> | 460    | 358 | 358 | 456 | 390.67 |
| <b>Sample 21</b> | 160    | 98  | 98  | 130 | 108.67 |
| <b>Sample 22</b> | 480    | 391 | 456 | 456 | 434.33 |
| <b>Sample 23</b> | 60     | 33  | 33  | 33  | 33.00  |
| <b>Sample 24</b> | 320    | 293 | 326 | 260 | 293.00 |
| <b>Sample 25</b> | 140    | 130 | 130 | 163 | 141.00 |
| <b>Sample 26</b> | 300    | 293 | 228 | 293 | 271.33 |
| <b>Sample 27</b> | 186.3  | 130 | 66  | 0   | 65.33  |
| <b>Sample 28</b> | 186.7  | 66  | 196 | 66  | 109.33 |
| <b>Sample 29</b> | 151    | 66  | 130 | 66  | 87.33  |
| <b>Sample 30</b> | 106.66 | 66  | 66  | 0   | 44.00  |

Table S2. Raw sample data for all isolated CD4 samples tested using functionalized microfluidic chips.

*Raw data – Whole blood samples*

| <i>Sample #</i> | <i>Flow cytometer (cells/<math>\mu</math>L)</i> | <i>Smartphone application (cells/<math>\mu</math>L)</i> |             |         |
|-----------------|-------------------------------------------------|---------------------------------------------------------|-------------|---------|
|                 |                                                 | Replicate 1                                             | Replicate 2 | Average |
| <b>Sample 1</b> | 632                                             | 586                                                     | 690         | 638     |
| <b>Sample 2</b> | 716                                             | 701                                                     | 692         | 696.5   |
| <b>Sample 3</b> | 400                                             | 408                                                     | 414         | 411     |
| <b>Sample 4</b> | 1114                                            | 1032                                                    | 977         | 1004.5  |
| <b>Sample 5</b> | 991                                             | 813                                                     | 1595        | 1204    |
| <b>Sample 6</b> | 1102                                            | 1237                                                    | 1269        | 1253    |
| <b>Sample 7</b> | 581                                             | 456                                                     | 651         | 553.5   |
| <b>Sample 8</b> | 512                                             | 391                                                     | 456         | 423.5   |



|                  |      |      |      |       |
|------------------|------|------|------|-------|
| <b>Sample 9</b>  | 1348 | 1302 | 1432 | 1367  |
| <b>Sample 10</b> | 221  | 195  | 326  | 260.5 |
| <b>Sample 11</b> | 598  | 456  | 521  | 488.5 |

Table S3. Raw data for whole blood samples tested using functionalized microfluidic chips.
